# Supplementary material
Source: ML conference proceedings conference paper supplement (https://aclanthology.org/2020.alw-1.20)
Supplement: OptionalSupplementaryMaterial [file 2020.alw-1.20.OptionalSupplementaryMaterial.zip]

# Topics in *Wiki*-dataset

This document is part of the supplementary material for the following paper:

Isar Nejadgholi and Svetlana Kiritchenko (2020) On Cross-Dataset Generalization in Automatic Detection of Online Abuse - WOA2020 Shared Exploration: Bias and Unfairness in the Detection of Online Abuse

The following 20 topics are extracted from *Wiki*-dataset annotated for toxicity<sup>1</sup> using LDA algorithm. Each topic is represented by 10 keywords. The number of utterances that fall under each topic and the percentage of toxic utterances is reported.

## Category 1: incoherent and mixture of general topics

---

Topic #0:

0.025\*”know” + 0.019\*”like” + 0.019\*”thank” + 0.015\*”think” + 0.014\*”want” + 0.013\*”look” + 0.012\*”I” + 0.012\*”ve” + 0.012\*”hi” + 0.011\*”time”

31210 documents - 0.195 of dataset

0.18% labeled as *Toxic* and 36% of all *Toxics*

---

Topic #1:

0.012\*”time” + 0.010\*”like” + 0.009\*”peopl” + 0.009\*”think” + 0.007\*”life” + 0.007\*”year” + 0.007\*”idiot” + 0.007\*”day” + 0.006\*”know” + 0.006\*”drink”

9598 documents - 0.060 of dataset

0.19% labeled as *Toxic* and 12% of all *Toxics*

## Category 2: coherent and high association with offensive language

---

Topic #2:

0.020\*”suck” + 0.015\*”year” + 0.010\*”new” + 0.009\*”citi” + 0.009\*”school” + 0.008\*”cock” + 0.008\*”old” + 0.008\*”dick” + 0.007\*”pussi” + 0.007\*”women”

6466 documents - 0.040 of all the documnets

0.18% labeled as *Toxic* and 8% of all *Toxics*

---

<sup>1</sup>[https://meta.wikimedia.org/wiki/Research:Detox/Data\\_Release](https://meta.wikimedia.org/wiki/Research:Detox/Data_Release)

---

Topic #7:

0.018\*”english” + 0.017\*”languag” + 0.016\*”peopl” + 0.011\*”countri” + 0.010\*”amer-  
ican” + 0.009\*”nation” + 0.008\*”term” + 0.008\*”use” + 0.008\*”word” +  
0.007\*”german”

7706 documents - 0.048 of dataset

0.06% labeled as *Toxic* and 3% of all *Toxics*

---

Topic #8:

0.047\*”kill” + 0.038\*”live” + 0.027\*”pro” + 0.024\*”die” + 0.023\*”eat” +  
0.018\*”jewish” + 0.017\*”anti” + 0.017\*”islam” + 0.016\*”al” + 0.016\*”israel”

997 documents - 0.006 of dataset

0.34% labeled as *Toxic* and 2% of all *Toxics*

---

Topic #9:

0.024\*”god” + 0.020\*”book” + 0.019\*”christian” + 0.009\*”jesus” + 0.009\*”cast”  
+ 0.008\*”king” + 0.008\*”prime” + 0.008\*”william” + 0.008\*”presid” + 0.008\*”japanes”

1102 documents - 0.007 of dataset

0.12% labeled as *Toxic* and 1% of all *Toxics*

---

Topic #12:

0.014\*”person” + 0.013\*”editor” + 0.013\*”admin” + 0.011\*”attack” + 0.011\*”say”  
+ 0.010\*”peopl” + 0.009\*”like” + 0.009\*”wikipedia” + 0.008\*”accus” + 0.008\*”user”

13949 documents - 0.087 of dataset

0.13% labeled as *Toxic* and 12% of all *Toxics*

---

Topic #14:

0.187\*”fuck” + 0.078\*”shit” + 0.056\*”ass” + 0.051\*”stupid” + 0.045\*”bas-  
tard” + 0.037\*”em” + 0.033\*”bitch” + 0.032\*”moron” + 0.030\*”cunt” + 0.027\*”hate”

1294 documents - 0.008 of dataset

0.97% labeled as *Toxic* and 8% of all *Toxics*

---

Topic #16:

0.040\*”team” + 0.031\*”footbal” + 0.029\*”infobox” + 0.027\*”award” + 0.023\*”win”  
+ 0.022\*”gay” + 0.015\*”air” + 0.015\*”engin” + 0.015\*”match” + 0.014\*”sta-  
tion”

475 documents - 0.003 of dataset

0.13% labeled as *Toxic* and 0.0% of all *Toxics*

---

**Category 3: coherent and low association with offensive language**

Topic #3:  
0.047\*”redirect” + 0.040\*”talk” + 0.039\*”utc” + 0.036\*”categori” + 0.032\*”film”  
+ 0.017\*”episod” + 0.013\*”merg” + 0.012\*”octob” + 0.012\*”decemb” + 0.011\*”januari”  
3023 documents - 0.019 of dataset  
0.04% labeled as *Toxic* and 1% of all *Toxics*

---

Topic #4:  
0.086\*”page” + 0.082\*”wikipedia” + 0.059\*”edit” + 0.043\*”talk” + 0.035\*”help”  
+ 0.033\*”articl” + 0.028\*”thank” + 0.022\*”question” + 0.016\*”ask” + 0.015\*”revert”  
10097 documents - 0.063 of dataset  
0.04% labeled as *Toxic* and 3% of all *Toxics*

---

Topic #5:  
0.086\*”sourc” + 0.021\*”reliabl” + 0.015\*”claim” + 0.012\*”cite” + 0.012\*”refer”  
+ 0.012\*”wikipedia” + 0.011\*”inform” + 0.011\*”fact” + 0.010\*”publish”  
+ 0.010\*”research”  
9439 documents - 0.059 of dataset  
0.04% labeled as *Toxic* and 3% of all *Toxics*

---

Topic #6:  
0.034\*”link” + 0.029\*”list” + 0.023\*”add” + 0.022\*”page” + 0.014\*”game” +  
0.013\*”inform” + 0.011\*”articl” + 0.010\*”date” + 0.010\*”chang” + 0.009\*”googl”  
7807 documents - 0.049 of dataset  
0.03% labeled as *Toxic* and 1% of all *Toxics*

---

Topic #10:  
0.102\*”delet” + 0.048\*”articl” + 0.045\*”imag” + 0.033\*”wikipedia” + 0.029\*”tag”  
+ 0.028\*”copyright” + 0.025\*”file” + 0.025\*”notabl” + 0.024\*”page” + 0.017\*”use”  
6308 documents - 0.040 of dataset  
0.02% labeled as *Toxic* and 1% of all *Toxics*

---

Topic #11:  
0.017\*”univers” + 0.017\*”th” + 0.012\*”law” + 0.012\*”scienc” + 0.011\*”theori”  
+ 0.009\*”capit” + 0.008\*”centuri” + 0.008\*”definit” + 0.008\*”state” +  
0.007\*”student”  
1875 documents - 0.012 of dataset  
0.03% labeled as *Toxic* and 0.0% of all *Toxics*

---

Topic #13:  
0.028\*”page” + 0.025\*”discuss” + 0.024\*”review” + 0.024\*”talk” + 0.023\*”thank”

+ 0.023\*”request” + 0.020\*”vertic” + 0.019\*”comment” + 0.018\*”templat” + 0.017\*”wp”

7555 documents - 0.047 of dataset  
0.02% labeled as *Toxic* and 1% of all *Toxics*

---

Topic #15:  
0.050\*”articl” + 0.011\*”think” + 0.011\*”section” + 0.009\*”wp” + 0.009\*”discuss” + 0.008\*”refer” + 0.008\*”editor” + 0.008\*”point” + 0.008\*”need” + 0.007\*”chang”

30128 documents - 0.189 of dataset  
0.02% labeled as *Toxic* and 3% of all *Toxics*

---

Topic #17:  
0.054\*”http” + 0.045\*”com” + 0.033\*”www” + 0.033\*”org” + 0.026\*”en” + 0.017\*”state” + 0.015\*”wiki” + 0.013\*”unit” + 0.011\*”compani” + 0.008\*”html”

2757 documents - 0.017 of dataset  
0.04% labeled as *Toxic* and 1% of all *Toxics*

---

Topic #18:  
0.121\*”edit” + 0.097\*”block” + 0.038\*”vandal” + 0.030\*”user” + 0.029\*”account” + 0.028\*”stop” + 0.027\*”ip” + 0.023\*”war” + 0.022\*”page” + 0.021\*”revert”

6559 documents - 0.041 of dataset  
0.09% labeled as *Toxic* and 4% of all *Toxics*

---

Topic #19:  
0.130\*”style” + 0.096\*”px” + 0.069\*”align” + 0.059\*”color” + 0.052\*”background” + 0.051\*”pad” + 0.044\*”middl” + 0.038\*”border” + 0.033\*”solid” + 0.023\*”size”

1341 documents - 0.008 of dataset  
0.06% labeled as *Toxic* and 1% of all *Toxics*
