# Supplementary material
Source: ML conference proceedings conference paper supplement (https://aclanthology.org/2020.alw-1.20)
Supplement: OptionalSupplementaryMaterial [file 2020.alw-1.20.OptionalSupplementaryMaterial.zip]

## Appendix A: Topics in *Wiki*-dataset

The following 20 topics are extracted from *Wiki*-dataset using LDA algorithm. Each topic is represented as a multinomial combination of 10 keywords. The number of utterances that fall under each topic and the percentage of offensive utterances is reported.

### Category 1: incoherent and mixture of general topics

---

Topic #0:

0.025\*”know” + 0.019\*”like” +  
0.019\*”thank” + 0.015\*”think” +  
0.014\*”want” + 0.013\*”look” + 0.012\*”ll” +  
0.012\*”ve” + 0.012\*”hi” + 0.011\*”time”

31210 documents - 0.195 of dataset  
0.18% labeled as *Toxic* and 36% of all *Toxics*

---

Topic #1:

0.012\*”time” + 0.010\*”like” + 0.009\*”peopl”  
+ 0.009\*”think” + 0.007\*”life” +  
0.007\*”year” + 0.007\*”idiot” + 0.007\*”day”  
+ 0.006\*”know” + 0.006\*”drink”

9598 documents - 0.060 of dataset  
0.19% labeled as *Toxic* and 12% of all *Toxics*

### Category 2: coherent and high association with offensive language

---

Topic #2:

0.020\*”suck” + 0.015\*”year” + 0.010\*”new”  
+ 0.009\*”citi” + 0.009\*”school” +  
0.008\*”cock” + 0.008\*”old” + 0.008\*”dick”  
+ 0.007\*”pussi” + 0.007\*”women”

6466 documents - 0.040 of all the documnets  
0.18% labeled as *Toxic* and 8% of all *Toxics*

---

Topic #7:

0.018\*”english” + 0.017\*”languag” +  
0.016\*”peopl” + 0.011\*”countri” +  
0.010\*”american” + 0.009\*”nation” +  
0.008\*”term” + 0.008\*”use” + 0.008\*”word”  
+ 0.007\*”german”

7706 documents - 0.048 of dataset  
0.06% labeled as *Toxic* and 3% of all *Toxics*

---

Topic #8:

0.047\*”kill” + 0.038\*”live” + 0.027\*”pro” +  
0.024\*”die” + 0.023\*”eat” + 0.018\*”jewish”  
+ 0.017\*”anti” + 0.017\*”islam” + 0.016\*”al”  
+ 0.016\*”israel”

997 documents - 0.006 of dataset  
0.34% labeled as *Toxic* and 2% of all *Toxics*

---

Topic #9:

0.024\*”god” + 0.020\*”book” + 0.019\*”chris-  
tian” + 0.009\*”jesus” + 0.009\*”cast”  
+ 0.008\*”king” + 0.008\*”prime” +  
0.008\*”william” + 0.008\*”presid” +  
0.008\*”japanes”

1102 documents - 0.007 of dataset  
0.12% labeled as *Toxic* and 1% of all *Toxics*

---

Topic #12:

0.014\*”person” + 0.013\*”editor” +  
0.013\*”admin” + 0.011\*”attack” +  
0.011\*”say” + 0.010\*”peopl” + 0.009\*”like”  
+ 0.009\*”wikipedia” + 0.008\*”accus” +  
0.008\*”user”

13949 documents - 0.087 of dataset  
0.13% labeled as *Toxic* and 12% of all *Toxics*

---

Topic #14:

0.187\*”fuck” + 0.078\*”shit” + 0.056\*”ass”  
+ 0.051\*”stupid” + 0.045\*”bastard” +  
0.037\*”em” + 0.033\*”bitch” + 0.032\*”mo-  
ron” + 0.030\*”cunt” + 0.027\*”hate”

1294 documents - 0.008 of dataset  
0.97% labeled as *Toxic* and 8% of all *Toxics*

---

Topic #16:

0.040\*”team” + 0.031\*”footbal” + 0.029\*”in-  
fobox” + 0.027\*”award” + 0.023\*”win” +  
0.022\*”gay” + 0.015\*”air” + 0.015\*”engin”  
+ 0.015\*”match” + 0.014\*”station”

475 documents - 0.003 of dataset  
0.13% labeled as *Toxic* and 0.0% of all *Toxics*

---

### Category 3: coherent and low association with offensive language

Topic #3:  
0.047\*”redirect” + 0.040\*”talk” +  
0.039\*”utc” + 0.036\*”categori” +  
0.032\*”film” + 0.017\*”episod” +  
0.013\*”merg” + 0.012\*”octob” + 0.012\*”de-  
cemb” + 0.011\*”januari”  
3023 documents - 0.019 of dataset  
0.04% labeled as *Toxic* and 1% of all *Toxics*

---

Topic #4:  
0.086\*”page” + 0.082\*”wikipedia” +  
0.059\*”edit” + 0.043\*”talk” + 0.035\*”help”  
+ 0.033\*”articl” + 0.028\*”thank” +  
0.022\*”question” + 0.016\*”ask” + 0.015\*”re-  
vert”  
10097 documents - 0.063 of dataset  
0.04% labeled as *Toxic* and 3% of all *Toxics*

---

Topic #5:  
0.086\*”sourc” + 0.021\*”reliabl” +  
0.015\*”claim” + 0.012\*”cite” + 0.012\*”refer”  
+ 0.012\*”wikipedia” + 0.011\*”inform” +  
0.011\*”fact” + 0.010\*”publish” + 0.010\*”re-  
search”

9439 documents - 0.059 of dataset  
0.04% labeled as *Toxic* and 3% of all *Toxics*

---

Topic #6:  
0.034\*”link” + 0.029\*”list” + 0.023\*”add” +  
0.022\*”page” + 0.014\*”game” + 0.013\*”in-  
form” + 0.011\*”articl” + 0.010\*”date” +  
0.010\*”chang” + 0.009\*”googl”

7807 documents - 0.049 of dataset  
0.03% labeled as *Toxic* and 1% of all *Toxics*

---

Topic #10:  
0.102\*”delet” + 0.048\*”articl” +  
0.045\*”imag” + 0.033\*”wikipedia” +  
0.029\*”tag” + 0.028\*”copyright” +  
0.025\*”file” + 0.025\*”notabl” + 0.024\*”page”  
+ 0.017\*”use”

6308 documents - 0.040 of dataset

0.02% labeled as *Toxic* and 1% of all *Toxics*

---

Topic #11:  
0.017\*”univers” + 0.017\*”th” + 0.012\*”law”  
+ 0.012\*”scienc” + 0.011\*”theori” +  
0.009\*”capit” + 0.008\*”centuri” +  
0.008\*”definit” + 0.008\*”state” + 0.007\*”stu-  
dent”

1875 documents - 0.012 of dataset  
0.03% labeled as *Toxic* and 0.0% of all *Toxics*

---

Topic #13:  
0.028\*”page” + 0.025\*”discuss” + 0.024\*”re-  
view” + 0.024\*”talk” + 0.023\*”thank”  
+ 0.023\*”request” + 0.020\*”vertic” +  
0.019\*”comment” + 0.018\*”templat” +  
0.017\*”wp”

7555 documents - 0.047 of dataset  
0.02% labeled as *Toxic* and 1% of all *Toxics*

---

Topic #15:  
0.050\*”articl” + 0.011\*”think” + 0.011\*”sec-  
tion” + 0.009\*”wp” + 0.009\*”dis-  
cuss” + 0.008\*”refer” + 0.008\*”edi-  
tor” + 0.008\*”point” + 0.008\*”need” +  
0.007\*”chang”

30128 documents - 0.189 of dataset  
0.02% labeled as *Toxic* and 3% of all *Toxics*

---

Topic #17:  
0.054\*”http” + 0.045\*”com” + 0.033\*”www”  
+ 0.033\*”org” + 0.026\*”en” + 0.017\*”state”  
+ 0.015\*”wiki” + 0.013\*”unit” + 0.011\*”com-  
pani” + 0.008\*”html”

2757 documents - 0.017 of dataset  
0.04% labeled as *Toxic* and 1% of all *Toxics*

---

Topic #18:  
0.121\*”edit” + 0.097\*”block” + 0.038\*”van-  
dal” + 0.030\*”user” + 0.029\*”account” +  
0.028\*”stop” + 0.027\*”ip” + 0.023\*”war” +  
0.022\*”page” + 0.021\*”revert”

6559 documents - 0.041 of dataset  
0.09% labeled as *Toxic* and 4% of all *Toxics*

---

Topic #19:

$0.130 \cdot \text{style} + 0.096 \cdot \text{px} + 0.069 \cdot \text{align}$   
 $+ 0.059 \cdot \text{color} + 0.052 \cdot \text{background} +$   
 $0.051 \cdot \text{pad} + 0.044 \cdot \text{middl} + 0.038 \cdot \text{bor-}$   
 $\text{der} + 0.033 \cdot \text{solid} + 0.023 \cdot \text{size}$

1341 documents - 0.008 of dataset  
0.06% labeled as *Toxic* and 1% of all *Toxics*
